# Supplementary material for: Potter Cove's Heavyweights: Estimation of Species' Interaction Strength of an Antarctic Food Web
Source: PubMed Central journal article supplement (PMC11531876; doi:10.1002/ece3.70389), 2024-11-03
Supplement: ECE3-14-e70389-s001.pdf [file ECE3-14-e70389-s001.pdf]

# Supporting Information for *Potter Cove's Heavyweights: Estimation of species' interaction strength of an Antarctic food web*

Iara Diamela Rodriguez and Leonardo Ariel Saravia

## Materials and methods

### I. Equations for calculating species properties

#### Interaction strength

We used the estimation of the interaction strength as a weighted property for the species of the Potter Cove food web. The main equation we used to estimate the interaction strength (IS) was:

$$IS = \frac{\alpha x_R m_R}{m_C}$$

where  $\alpha$  is the search rate,  $x_R$  is the resource density and  $m_R$  and  $m_C$  the body mass for the resource and the consumer, respectively (Pawar et al., 2012). We assume the case where resources are scarce because this resembles field conditions (figure 3.e and f and equation 3 from Pawar et al. (2012)). Then the search rate for 2D interactions is calculated as:

$$\alpha = \alpha_{2D} m_C^{0.68 \pm 0.12}$$

For 3D interactions it is calculated as:

$$\alpha = \alpha_{3D} m_C^{1.05 \pm 0.08}$$

where  $\alpha_{2D} = 10^{-3.08}$  and  $\alpha_{3D} = 10^{-1.77}$  are the intercepts for each interaction dimensionality.

When empirical resource density ( $x_R$ ) was not available, we estimated it according to the equation S18 and supplementary figures 2.i and j (individuals/m<sup>2</sup> - m<sup>3</sup>) from Pawar et al. (2012):

$$x_R = x_0 m_R^{-p_x}$$

where  $p_x$  is  $-0.79 \pm 0.08$  for 2D and  $-0.86 \pm 0.07$  for 3D.

### Topological properties

As unweighted properties we calculated species trophic level, degree, omnivory and trophic similarity.

The **trophic level** was calculated for every species based on its position in the food web using the “prey-averaged technique”. This metric is based on the trophic position of all prey in the diet of a consumer, where primary producers are assigned a TL = 0, and assumes that all links are quantitatively equivalent (each taxon eats the same amount of every prey).  $TP$  is calculated for taxon  $i$  from the binary matrix of trophic interactions as:

$$TP_i = \frac{\sum_j TP_j}{n_i} + 1$$

where  $n_i$  is the total number of prey taxa consumed by taxon  $i$ , and  $TP_j$  represents the trophic position of all prey items ( $j$ ) of taxon  $i$  (Thompson et al., 2007)

The **degree**  $k$  is simply the total number of feeding links in which the species participates. It was calculated as:

$$L = \sum_{i=1}^s k_i$$

where  $L$  is the total number of feeding links for the  $i^{th}$  species in the food web; here denoted as  $k_i$ .

**Omnivory** is calculated as the variance of the trophic levels of a consumer's preys. For species  $i$ :

$$OI = \sum_{j=1}^n (TL_j - TL)^2 DC_{ij}$$

where  $n$  is the number of species in the system,  $TL_j$  is the trophic level of prey  $j$ ,  $TL$  is the average trophic level of the preys, and  $DC_{ij}$  is the fraction of prey ( $j$ ) in the average diet of predator ( $i$ ) (Libralato, 2008).

The **trophic similarity** ( $TS$ ) between every pair of species in the food web was calculated using the following algorithm:

$$TS = \frac{c}{a + b + c}$$

where  $c$  is the number of predators and prey common to the two species,  $a$  is the number of predators and prey unique to one species, and  $b$  is the number of predators and prey unique to the other species. When the two species have the same set of predators and

prey,  $TS = 1$ ; when the two species have no common predators or common prey,  $TS = 0$  (Martinez, 1991).

The **intermodule connectivity** (IMC) estimates the links distribution of species  $i$  among modules, as follows:

$$IMC_i = 1 - \sum_s \frac{k_{is}}{k_i}$$

where  $k_i$  is the total number of links of species  $i$  and  $k_{is}$  is the number of links of species  $i$  to species in module  $s$ .

## Results

### I. Interaction strength distribution

**Table S1.** Model comparison for the distribution of interaction strengths of the Potter Cove food web. Order by best fit. References: AIC = Akaike Information Criterion,  $\Delta$ AIC = difference with best fit. \*Indicates best-fit model.

| Model       | AIC      | $\Delta$ AIC |
|-------------|----------|--------------|
| Gamma*      | -9703.21 | 0            |
| Power-law   | -9645.35 | 57.85        |
| Log-Normal  | -9431.38 | 271.82       |
| Exponential | -5654.65 | 4048.56      |
| Normal      | -4095.24 | 5607.96      |
| Uniform     | -3251.24 | 6451.97      |

### II. Species interaction strength and topological properties

**Table S2.** Results of quantile regression analyses, coefficients and significance levels for log total interaction strength and topological properties (trophic level, degree, omnivory, and trophic similarity) at quantiles 0.25, 0.5, and 0.75. \* Indicates statistical significance (p-value <0.05).

|     |                   | Trophic level | Degree | Omnivory | Trophic similarity |
|-----|-------------------|---------------|--------|----------|--------------------|
| q25 | Coefficient value | 0.228         | 0.970  | -1.865   | 13.974             |
|     | p-value           | 0.680         | 0.000* | 0.588    | 0.243              |
| q50 | Coefficient value | -0.143        | 0.864  | -0.145   | 12.756             |
|     | p-value           | 0.648         | 0.009* | 0.942    | 0.002*             |
| q75 | Coefficient value | -0.749        | 0.822  | -3.885   | 11.535             |
|     | p-value           | 0.001*        | 0.007* | 0.018*   | 0.109*             |

### III. Species impact on food web stability and fragmentation

**Table S3.** Effect of species extinction by decreasing (a) interaction strength (weighted property), (b) trophic level, (c) degree, (d) omnivory and (e) trophic similarity (unweighted properties) on the Potter Cove food web stability and fragmentation. Stability = mean maximum eigenvalue, Q1 = first quartile of the stability distribution, Q3 = third quartile of the stability distribution, Size = food web size. On darker green species that when deleted have great impact on food web stability. On lighter green species that when removed fragmented the food web.

| Last deleted sp.                                         | Stability    | Q1           | Q3           | Size       | Components | Proportion of deleted sp. |
|----------------------------------------------------------|--------------|--------------|--------------|------------|------------|---------------------------|
| <b>(a) EXTINTIONS BY DECREASING INTERACTION STRENGTH</b> |              |              |              |            |            |                           |
| Total                                                    | 0,029        | 0,019        | 0,045        | 110        | 1          | 0,00                      |
| Fresh detritus                                           | 0,029        | 0,018        | 0,043        | 109        | 1          | 0,01                      |
| Aged detritus                                            | 0,030        | 0,020        | 0,046        | 108        | 1          | 0,02                      |
| <b><i>Prostebbingia sp.</i></b>                          | <b>0,012</b> | <b>0,005</b> | <b>0,024</b> | <b>107</b> | <b>1</b>   | <b>0,03</b>               |
| <b><i>Prostebbingia gracilis</i></b>                     | <b>0,005</b> | <b>0,003</b> | <b>0,009</b> | <b>106</b> | <b>1</b>   | <b>0,04</b>               |
| Necromass                                                | 0,004        | 0,003        | 0,009        | 105        | 1          | 0,05                      |
| <i>Gondogeneia antarctica</i>                            | 0,003        | 0,002        | 0,004        | 104        | 1          | 0,05                      |
| <i>Palmaria decipiens</i>                                | 0,003        | 0,002        | 0,004        | 103        | 1          | 0,06                      |
| <i>Laevilacunaria antarctica</i>                         | 0,003        | 0,002        | 0,004        | 102        | 1          | 0,07                      |
| Gammaridea                                               | 0,003        | 0,002        | 0,004        | 101        | 1          | 0,08                      |
| Polychaeta                                               | 0,003        | 0,002        | 0,004        | 100        | 1          | 0,09                      |
| <i>Desmarestia menziesii</i>                             | 0,003        | 0,002        | 0,004        | 99         | 1          | 0,10                      |
| <i>Desmarestia anceps</i>                                | 0,003        | 0,002        | 0,004        | 98         | 1          | 0,11                      |
| <i>Desmarestia antarctica</i>                            | 0,003        | 0,002        | 0,004        | 97         | 1          | 0,12                      |
| <i>Gigartina skottsbergii</i>                            | 0,003        | 0,002        | 0,004        | 96         | 1          | 0,13                      |
| <i>Iridaea cordata</i>                                   | 0,003        | 0,002        | 0,004        | 95         | 1          | 0,14                      |
| <i>Plocamium cartilagineum</i>                           | 0,003        | 0,002        | 0,004        | 94         | 1          | 0,15                      |
| <i>Cheirimedon femoratus</i>                             | 0,003        | 0,002        | 0,004        | 93         | 1          | 0,15                      |
| Porifera                                                 | 0,003        | 0,002        | 0,004        | 92         | 1          | 0,16                      |
| <i>Myriogramme manginii</i>                              | 0,003        | 0,002        | 0,004        | 91         | 1          | 0,17                      |
| <i>Pariphimedia integricauda</i>                         | 0,003        | 0,002        | 0,004        | 90         | 1          | 0,18                      |
| <b><i>Paradexamine fissicauda</i></b>                    | <b>0,003</b> | <b>0,002</b> | <b>0,004</b> | <b>89</b>  | <b>2</b>   | <b>0,19</b>               |
| Oligochaeta                                              | 0,003        | 0,002        | 0,004        | 88         | 2          | 0,20                      |
| <i>Oradarea bidentata</i>                                | 0,003        | 0,002        | 0,004        | 87         | 2          | 0,21                      |
| <i>Orchomenella sp.</i>                                  | 0,003        | 0,002        | 0,004        | 86         | 2          | 0,22                      |
| <i>Eatoniella sp.</i>                                    | 0,003        | 0,002        | 0,004        | 85         | 2          | 0,23                      |
| <i>Ophionotus victoriae</i>                              | 0,002        | 0,001        | 0,003        | 84         | 2          | 0,24                      |
| Priapulida                                               | 0,002        | 0,001        | 0,003        | 83         | 2          | 0,25                      |
| <i>Eurymera monticulosa</i>                              | 0,002        | 0,002        | 0,003        | 82         | 2          | 0,25                      |
| <b><i>Notothenia coriiceps</i></b>                       | <b>0,002</b> | <b>0,001</b> | <b>0,003</b> | <b>81</b>  | <b>14</b>  | <b>0,26</b>               |
| <i>Odontaster validus</i>                                | 0,002        | 0,001        | 0,003        | 80         | 14         | 0,27                      |
| <i>Adenocystis utricularis</i>                           | 0,002        | 0,001        | 0,003        | 79         | 13         | 0,28                      |
| Polynoidae                                               | 0,002        | 0,001        | 0,003        | 78         | 13         | 0,29                      |
| Hydrozoa                                                 | 0,002        | 0,001        | 0,003        | 77         | 13         | 0,30                      |
| <i>Charcotia obesa</i>                                   | 0,002        | 0,001        | 0,003        | 76         | 13         | 0,31                      |
| Cumacea                                                  | 0,002        | 0,001        | 0,003        | 75         | 13         | 0,32                      |
| Stylo_Myca                                               | 0,001        | 0,001        | 0,002        | 74         | 14         | 0,33                      |
| <i>Aequiyoldia eightsii</i>                              | 0,001        | 0,001        | 0,002        | 73         | 14         | 0,34                      |
| <i>Hippomedon kergueleni</i>                             | 0,001        | 0,001        | 0,002        | 72         | 14         | 0,35                      |

|                             |       |       |       |    |    |      |
|-----------------------------|-------|-------|-------|----|----|------|
| Polyplacophora              | 0,001 | 0,001 | 0,002 | 71 | 14 | 0,35 |
| <i>Laternula elliptica</i>  | 0,001 | 0,001 | 0,002 | 70 | 14 | 0,36 |
| <i>Notothenia rossii</i>    | 0,001 | 0,001 | 0,002 | 69 | 15 | 0,37 |
| Tanaidacea                  | 0,001 | 0,001 | 0,002 | 68 | 15 | 0,38 |
| <i>Phaeurus antarcticus</i> | 0,001 | 0,001 | 0,003 | 67 | 14 | 0,39 |
| Cephalopoda                 | 0,002 | 0,001 | 0,003 | 66 | 14 | 0,40 |
| Nereididae                  | 0,001 | 0,001 | 0,003 | 65 | 14 | 0,41 |
| Serolis sp.                 | 0,001 | 0,001 | 0,002 | 64 | 14 | 0,42 |
| <i>Georgiella confluens</i> | 0,002 | 0,001 | 0,003 | 63 | 13 | 0,43 |
| <i>Curdiea racovitzae</i>   | 0,001 | 0,001 | 0,002 | 62 | 12 | 0,44 |
| <i>Monostroma hariotii</i>  | 0,002 | 0,001 | 0,003 | 61 | 11 | 0,45 |
| Mysida                      | 0,001 | 0,001 | 0,002 | 60 | 11 | 0,45 |

**(b) EXTINTIONS BY DECREASING TROPHIC LEVEL**

|                                     |              |              |              |           |          |             |
|-------------------------------------|--------------|--------------|--------------|-----------|----------|-------------|
| Total                               | 0,031        | 0,019        | 0,046        | 110       | 1        | 0,00        |
| <i>Chaenocephalus aceratus</i>      | 0,028        | 0,018        | 0,044        | 109       | 1        | 0,01        |
| <i>Urticinopsis antarctica</i>      | 0,029        | 0,018        | 0,044        | 108       | 1        | 0,02        |
| <i>Parachaenichthys charcoti</i>    | 0,030        | 0,018        | 0,045        | 107       | 1        | 0,03        |
| Octopoda                            | 0,031        | 0,018        | 0,046        | 106       | 1        | 0,04        |
| <i>Trematomus bernacchii</i>        | 0,029        | 0,018        | 0,043        | 105       | 1        | 0,05        |
| <i>Lindbergichthys nudifrons</i>    | 0,028        | 0,018        | 0,044        | 104       | 1        | 0,05        |
| Cephalopoda                         | 0,030        | 0,019        | 0,046        | 103       | 1        | 0,06        |
| Hyperidea                           | 0,030        | 0,020        | 0,044        | 102       | 1        | 0,07        |
| <i>Harpagifer antarcticus</i>       | 0,030        | 0,019        | 0,044        | 101       | 1        | 0,08        |
| <i>Trematomus newnesi</i>           | 0,031        | 0,019        | 0,047        | 100       | 1        | 0,09        |
| <i>Barrukia cristata</i>            | 0,030        | 0,019        | 0,043        | 99        | 1        | 0,10        |
| <i>Glyptonotus antarcticus</i>      | 0,029        | 0,018        | 0,045        | 98        | 1        | 0,11        |
| <i>Gobionotothen gibberifrons</i>   | 0,030        | 0,018        | 0,045        | 97        | 1        | 0,12        |
| <i>Ophionotus victoriae</i>         | 0,030        | 0,019        | 0,047        | 96        | 1        | 0,13        |
| Priapulida                          | 0,030        | 0,018        | 0,044        | 95        | 1        | 0,14        |
| <i>Euphausia superba</i>            | 0,029        | 0,018        | 0,044        | 94        | 1        | 0,15        |
| Hydrozoa                            | 0,028        | 0,018        | 0,043        | 93        | 1        | 0,15        |
| Polynoidae                          | 0,030        | 0,019        | 0,047        | 92        | 1        | 0,16        |
| <i>Parborlasia corrugatus</i>       | 0,029        | 0,018        | 0,044        | 91        | 1        | 0,17        |
| <i>Notothenia rossii</i>            | 0,030        | 0,019        | 0,045        | 90        | 1        | 0,18        |
| Nemertea                            | 0,030        | 0,019        | 0,044        | 89        | 1        | 0,19        |
| Salpidae                            | 0,030        | 0,019        | 0,045        | 88        | 1        | 0,20        |
| <i>Odontaster meridionalis</i>      | 0,030        | 0,018        | 0,045        | 87        | 1        | 0,21        |
| <i>Odontaster validus</i>           | 0,031        | 0,018        | 0,046        | 86        | 1        | 0,22        |
| <i>Perknaster aurorae</i>           | 0,028        | 0,018        | 0,043        | 85        | 1        | 0,23        |
| Serolis sp.                         | 0,029        | 0,018        | 0,044        | 84        | 1        | 0,24        |
| <b><i>Notothenia coriiceps</i></b>  | <b>0,029</b> | <b>0,019</b> | <b>0,044</b> | <b>83</b> | <b>9</b> | <b>0,25</b> |
| Polychaeta                          | 0,029        | 0,019        | 0,045        | 82        | 9        | 0,25        |
| <i>Diplasterias brucei</i>          | 0,029        | 0,018        | 0,044        | 81        | 9        | 0,26        |
| <i>Sterechinus neumayeri</i>        | 0,030        | 0,018        | 0,046        | 80        | 9        | 0,27        |
| <i>Aglaophamus trissophyllus</i>    | 0,031        | 0,019        | 0,044        | 79        | 9        | 0,28        |
| <i>Bovallia gigantea</i>            | 0,030        | 0,020        | 0,045        | 78        | 9        | 0,29        |
| Gastropoda                          | 0,031        | 0,019        | 0,046        | 77        | 9        | 0,30        |
| <i>Doris kerguelenensis</i>         | 0,030        | 0,019        | 0,045        | 76        | 9        | 0,31        |
| <i>Perknaster fuscus antarticus</i> | 0,031        | 0,020        | 0,046        | 75        | 9        | 0,32        |
| Nereididae                          | 0,031        | 0,019        | 0,045        | 74        | 9        | 0,33        |
| <i>Hemiarthrum setulosum</i>        | 0,031        | 0,020        | 0,047        | 73        | 9        | 0,34        |
| Mysida                              | 0,031        | 0,019        | 0,047        | 72        | 9        | 0,35        |
| <i>Malacobelemnion daytoni</i>      | 0,028        | 0,018        | 0,044        | 71        | 9        | 0,35        |
| <i>Neobuccinum eatoni</i>           | 0,028        | 0,018        | 0,045        | 70        | 9        | 0,36        |
| <i>Cheirimedon femoratus</i>        | 0,029        | 0,018        | 0,044        | 69        | 9        | 0,37        |
| <i>Orchomenella sp.</i>             | 0,030        | 0,018        | 0,045        | 68        | 9        | 0,38        |

|                                            |              |              |              |            |           |             |
|--------------------------------------------|--------------|--------------|--------------|------------|-----------|-------------|
| <i>Aequiyoldia eightsii</i>                | 0,029        | 0,018        | 0,044        | 67         | 9         | 0,39        |
| Copepoda                                   | 0,030        | 0,019        | 0,046        | 66         | 9         | 0,40        |
| Polyplacophora                             | 0,029        | 0,018        | 0,045        | 65         | 9         | 0,41        |
| <i>Eatoniella sp.</i>                      | 0,030        | 0,019        | 0,046        | 64         | 9         | 0,42        |
| Gammaridea                                 | 0,026        | 0,015        | 0,045        | 63         | 9         | 0,43        |
| Asciacea                                   | 0,028        | 0,016        | 0,045        | 62         | 9         | 0,44        |
| Terebellidae                               | 0,027        | 0,015        | 0,043        | 61         | 9         | 0,45        |
| Ostracoda                                  | 0,028        | 0,016        | 0,047        | 60         | 9         | 0,45        |
| <b>(c) EXTINTIONS BY DECREASING DEGREE</b> |              |              |              |            |           |             |
| Total                                      | 0,029        | 0,018        | 0,044        | 110        | 1         | 0,00        |
| <b><i>Notothenia coriiceps</i></b>         | <b>0,028</b> | <b>0,019</b> | <b>0,044</b> | <b>109</b> | <b>9</b>  | <b>0,01</b> |
| Fresh detritus                             | 0,030        | 0,019        | 0,046        | 108        | 9         | 0,02        |
| <i>Notothenia rossii</i>                   | 0,029        | 0,018        | 0,045        | 107        | 9         | 0,03        |
| <i>Trematomus bernacchii</i>               | 0,029        | 0,018        | 0,043        | 106        | 9         | 0,04        |
| Benthic Diatomea                           | 0,030        | 0,018        | 0,043        | 105        | 9         | 0,05        |
| <i>Ophionotus victoriae</i>                | 0,029        | 0,018        | 0,044        | 104        | 9         | 0,05        |
| Polychaeta                                 | 0,029        | 0,017        | 0,044        | 103        | 9         | 0,06        |
| Copepoda                                   | 0,030        | 0,018        | 0,046        | 102        | 9         | 0,07        |
| <i>Harpagifer antarcticus</i>              | 0,030        | 0,018        | 0,044        | 101        | 9         | 0,08        |
| Aged detritus                              | 0,030        | 0,019        | 0,046        | 100        | 9         | 0,09        |
| <i>Trematomus newnesi</i>                  | 0,030        | 0,018        | 0,044        | 99         | 10        | 0,10        |
| Necromass                                  | 0,031        | 0,019        | 0,046        | 98         | 10        | 0,11        |
| <i>Odontaster validus</i>                  | 0,031        | 0,019        | 0,045        | 97         | 10        | 0,12        |
| Phytoplankton                              | 0,030        | 0,019        | 0,045        | 96         | 11        | 0,13        |
| Nereididae                                 | 0,031        | 0,019        | 0,045        | 95         | 11        | 0,14        |
| Gammaridea                                 | 0,027        | 0,013        | 0,046        | 94         | 11        | 0,15        |
| <i>Lindbergichthys nudifrons</i>           | 0,027        | 0,013        | 0,046        | 93         | 12        | 0,15        |
| <i>Sterechinus neumayeri</i>               | 0,028        | 0,015        | 0,046        | 92         | 12        | 0,16        |
| <b><i>Gondogeneia antarctica</i></b>       | <b>0,019</b> | <b>0,003</b> | <b>0,040</b> | <b>91</b>  | <b>14</b> | <b>0,17</b> |
| Ostracoda                                  | 0,016        | 0,002        | 0,040        | 90         | 14        | 0,18        |
| <i>Bovallia gigantea</i>                   | 0,016        | 0,003        | 0,038        | 89         | 16        | 0,19        |
| Zooplankton                                | 0,016        | 0,003        | 0,040        | 88         | 18        | 0,20        |
| Hydrozoa                                   | 0,016        | 0,002        | 0,040        | 87         | 18        | 0,21        |
| Polynoidae                                 | 0,016        | 0,003        | 0,041        | 86         | 19        | 0,22        |
| Gastropoda                                 | 0,016        | 0,003        | 0,040        | 85         | 20        | 0,23        |
| Porifera                                   | 0,018        | 0,003        | 0,040        | 84         | 23        | 0,24        |
| <b><i>Prostebbingia gracilis</i></b>       | <b>0,002</b> | <b>0,001</b> | <b>0,003</b> | <b>83</b>  | <b>23</b> | <b>0,25</b> |
| <i>Prostebbingia sp.</i>                   | 0,001        | 0,001        | 0,002        | 82         | 26        | 0,25        |
| <i>Euphausia superba</i>                   | 0,001        | 0,001        | 0,002        | 81         | 27        | 0,26        |
| Mysida                                     | 0,001        | 0,001        | 0,002        | 80         | 28        | 0,27        |
| <i>Gobionotothen gibberifrons</i>          | 0,001        | 0,001        | 0,002        | 79         | 30        | 0,28        |
| <i>Glyptonotus antarcticus</i>             | 0,001        | 0,001        | 0,002        | 78         | 30        | 0,29        |
| Nemertea                                   | 0,001        | 0,001        | 0,002        | 77         | 32        | 0,30        |
| Salpidae                                   | 0,001        | 0,001        | 0,002        | 76         | 33        | 0,31        |
| <i>Parborlasia corrugatus</i>              | 0,001        | 0,000        | 0,001        | 75         | 34        | 0,32        |
| <i>Aequiyoldia eightsii</i>                | 0,000        | 0,000        | 0,001        | 74         | 34        | 0,33        |
| Stylo_Myca                                 | 0,000        | 0,000        | 0,001        | 73         | 35        | 0,34        |
| Bryozoa                                    | 0,000        | 0,000        | 0,001        | 72         | 35        | 0,35        |
| <i>Palmaria decipiens</i>                  | 0,000        | 0,000        | 0,001        | 71         | 37        | 0,35        |
| <i>Laevilacunaria antarctica</i>           | 0,000        | 0,000        | 0,001        | 70         | 45        | 0,36        |
| <i>Orchomenella sp.</i>                    | 0,000        | 0,000        | 0,001        | 69         | 44        | 0,37        |
| Polyplacophora                             | 0,000        | 0,000        | 0,001        | 68         | 45        | 0,38        |
| <i>Nacella concinna</i>                    | 0,000        | 0,000        | 0,001        | 67         | 47        | 0,39        |
| <i>Paradexamine fissicauda</i>             | 0,000        | 0,000        | 0,001        | 66         | 48        | 0,40        |
| Hyperiidea                                 | 0,000        | 0,000        | 0,001        | 65         | 47        | 0,41        |
| <i>Urticinopsis antarctica</i>             | 0,000        | 0,000        | 0,001        | 64         | 48        | 0,42        |

|                           |       |       |       |    |    |      |
|---------------------------|-------|-------|-------|----|----|------|
| <i>Charcotia obesa</i>    | 0,000 | 0,000 | 0,001 | 63 | 47 | 0,43 |
| <i>Neobuccinum eatoni</i> | 0,000 | 0,000 | 0,001 | 62 | 49 | 0,44 |
| <i>Rosella antarctica</i> | 0,000 | 0,000 | 0,000 | 61 | 50 | 0,45 |
| Tanaidacea                | 0,000 | 0,000 | 0,000 | 60 | 49 | 0,45 |

**(d) EXTINTIONS BY DECREASING OMNIVORY**

|                                      |              |              |              |           |          |             |
|--------------------------------------|--------------|--------------|--------------|-----------|----------|-------------|
| Total                                | 0,031        | 0,019        | 0,046        | 110       | 1        | 0,00        |
| Zooplankton                          | 0,029        | 0,018        | 0,045        | 109       | 1        | 0,01        |
| Hydrozoa                             | 0,028        | 0,017        | 0,044        | 108       | 1        | 0,02        |
| <i>Diplasterias brucei</i>           | 0,030        | 0,018        | 0,046        | 107       | 1        | 0,03        |
| Nemertea                             | 0,029        | 0,018        | 0,045        | 106       | 1        | 0,04        |
| <i>Aglaophamus trissophyllus</i>     | 0,030        | 0,019        | 0,045        | 105       | 1        | 0,05        |
| <i>Gobionotothen gibberifrons</i>    | 0,028        | 0,017        | 0,043        | 104       | 1        | 0,05        |
| <i>Glyptonotus antarcticus</i>       | 0,029        | 0,018        | 0,045        | 103       | 1        | 0,06        |
| <i>Odontaster validus</i>            | 0,030        | 0,019        | 0,045        | 102       | 1        | 0,07        |
| <i>Aequiyoldia eightsii</i>          | 0,029        | 0,018        | 0,043        | 101       | 1        | 0,08        |
| Polynoidae                           | 0,028        | 0,018        | 0,044        | 100       | 1        | 0,09        |
| Gastropoda                           | 0,029        | 0,019        | 0,046        | 99        | 1        | 0,10        |
| Polyplacophora                       | 0,028        | 0,017        | 0,044        | 98        | 1        | 0,11        |
| <i>Serolis sp.</i>                   | 0,029        | 0,019        | 0,044        | 97        | 1        | 0,12        |
| <i>Ophionotus victoriae</i>          | 0,028        | 0,018        | 0,044        | 96        | 1        | 0,13        |
| <i>Neobuccinum eatoni</i>            | 0,029        | 0,018        | 0,046        | 95        | 1        | 0,14        |
| <i>Charcotia obesa</i>               | 0,029        | 0,019        | 0,043        | 94        | 1        | 0,15        |
| <i>Sterechinus neumayeri</i>         | 0,029        | 0,018        | 0,046        | 93        | 1        | 0,15        |
| <i>Barrukia cristata</i>             | 0,030        | 0,019        | 0,045        | 92        | 1        | 0,16        |
| <i>Parachaenichthys charcoti</i>     | 0,028        | 0,018        | 0,045        | 91        | 1        | 0,17        |
| <i>Orchomenella sp.</i>              | 0,029        | 0,018        | 0,043        | 90        | 1        | 0,18        |
| <i>Perknaster fuscus antarcticus</i> | 0,031        | 0,019        | 0,045        | 89        | 1        | 0,19        |
| <i>Chaenocephalus aceratus</i>       | 0,029        | 0,019        | 0,045        | 88        | 1        | 0,20        |
| Hyperiidea                           | 0,029        | 0,018        | 0,043        | 87        | 1        | 0,21        |
| <i>Doris kerguelenensis</i>          | 0,029        | 0,018        | 0,043        | 86        | 1        | 0,22        |
| <i>Trematomus bernacchii</i>         | 0,029        | 0,019        | 0,045        | 85        | 1        | 0,23        |
| <i>Notothenia rossii</i>             | 0,030        | 0,018        | 0,045        | 84        | 1        | 0,24        |
| <b><i>Notothenia coriiceps</i></b>   | <b>0,029</b> | <b>0,018</b> | <b>0,045</b> | <b>83</b> | <b>9</b> | <b>0,25</b> |
| <i>Parborlasia corrugatus</i>        | 0,030        | 0,018        | 0,044        | 82        | 9        | 0,25        |
| <i>Eatoniella sp.</i>                | 0,030        | 0,018        | 0,045        | 81        | 9        | 0,26        |
| <i>Trematomus newnesi</i>            | 0,030        | 0,019        | 0,045        | 80        | 9        | 0,27        |
| Nereididae                           | 0,031        | 0,020        | 0,046        | 79        | 9        | 0,28        |
| <i>Harpagifer antarcticus</i>        | 0,030        | 0,019        | 0,044        | 78        | 9        | 0,29        |
| <i>Urticinopsis antarctica</i>       | 0,029        | 0,019        | 0,044        | 77        | 9        | 0,30        |
| <i>Euphausia superba</i>             | 0,030        | 0,018        | 0,044        | 76        | 9        | 0,31        |
| <i>Bovallia gigantea</i>             | 0,029        | 0,019        | 0,044        | 75        | 9        | 0,32        |
| Polychaeta                           | 0,030        | 0,018        | 0,045        | 74        | 9        | 0,33        |
| Octopoda                             | 0,031        | 0,019        | 0,047        | 73        | 9        | 0,34        |
| <i>Lindbergichthys nudifrons</i>     | 0,030        | 0,020        | 0,044        | 72        | 9        | 0,35        |
| Salpidae                             | 0,031        | 0,019        | 0,045        | 71        | 9        | 0,35        |
| <i>Cheirimedon femoratus</i>         | 0,031        | 0,018        | 0,046        | 70        | 9        | 0,36        |
| <i>Odontaster meridionalis</i>       | 0,029        | 0,018        | 0,045        | 69        | 9        | 0,37        |
| Aged detritus                        | 0,031        | 0,020        | 0,046        | 68        | 9        | 0,38        |
| Benthic Diatomea                     | 0,030        | 0,018        | 0,046        | 67        | 12       | 0,39        |
| Fresh detritus                       | 0,031        | 0,018        | 0,045        | 66        | 19       | 0,40        |
| Phytoplankton                        | 0,031        | 0,018        | 0,046        | 65        | 25       | 0,41        |
| Copepoda                             | 0,030        | 0,018        | 0,046        | 64        | 26       | 0,42        |
| Porifera                             | 0,030        | 0,018        | 0,045        | 63        | 26       | 0,43        |
| <i>Eurymera monticulosa</i>          | 0,030        | 0,018        | 0,044        | 62        | 26       | 0,44        |
| <i>Gitanopsis squamosa</i>           | 0,031        | 0,019        | 0,046        | 61        | 26       | 0,45        |
| <i>Gondogeneia antarctica</i>        | 0,024        | 0,010        | 0,043        | 60        | 27       | 0,45        |

| <b>(e) EXTINTIONS BY DECREASING TROPHIC SIMILARITY</b> |              |              |              |           |          |             |
|--------------------------------------------------------|--------------|--------------|--------------|-----------|----------|-------------|
| Total                                                  | 0,029        | 0,018        | 0,044        | 110       | 1        | 0,00        |
| <i>Orchomenella sp.</i>                                | 0,029        | 0,018        | 0,044        | 109       | 1        | 0,01        |
| <i>Djerboa furcipes</i>                                | 0,029        | 0,018        | 0,045        | 108       | 1        | 0,02        |
| Ascidiacea                                             | 0,029        | 0,019        | 0,045        | 107       | 1        | 0,03        |
| Ostracoda                                              | 0,029        | 0,018        | 0,045        | 106       | 1        | 0,04        |
| <i>Aequiyoldia eightsii</i>                            | 0,029        | 0,017        | 0,046        | 105       | 1        | 0,05        |
| <i>Cheirimedon femoratus</i>                           | 0,031        | 0,018        | 0,047        | 104       | 1        | 0,05        |
| Tanaidacea                                             | 0,028        | 0,018        | 0,044        | 103       | 1        | 0,06        |
| Hydrozoa                                               | 0,029        | 0,018        | 0,045        | 102       | 1        | 0,07        |
| <i>Charcotia obesa</i>                                 | 0,030        | 0,019        | 0,045        | 101       | 1        | 0,08        |
| Mysida                                                 | 0,030        | 0,019        | 0,045        | 100       | 1        | 0,09        |
| <i>Gitanopsis squamosa</i>                             | 0,031        | 0,018        | 0,046        | 99        | 1        | 0,10        |
| <i>Eurymera monticulosa</i>                            | 0,032        | 0,019        | 0,047        | 98        | 1        | 0,11        |
| <i>Pariphimedia integricauda</i>                       | 0,030        | 0,018        | 0,046        | 97        | 1        | 0,12        |
| <i>Probolisca ovata</i>                                | 0,029        | 0,017        | 0,044        | 96        | 1        | 0,13        |
| Nereididae                                             | 0,029        | 0,018        | 0,045        | 95        | 1        | 0,14        |
| <i>Oradarea bidentata</i>                              | 0,032        | 0,017        | 0,048        | 94        | 1        | 0,15        |
| <i>Margarella antarctica</i>                           | 0,030        | 0,017        | 0,046        | 93        | 1        | 0,15        |
| Copepoda                                               | 0,029        | 0,016        | 0,045        | 92        | 1        | 0,16        |
| <i>Bovallia gigantea</i>                               | 0,027        | 0,016        | 0,044        | 91        | 1        | 0,17        |
| <i>Glyptonotus antarcticus</i>                         | 0,030        | 0,017        | 0,047        | 90        | 1        | 0,18        |
| Gastropoda                                             | 0,031        | 0,017        | 0,048        | 89        | 1        | 0,19        |
| Salpidae                                               | 0,030        | 0,017        | 0,047        | 88        | 1        | 0,20        |
| Gammaridea                                             | 0,025        | 0,012        | 0,045        | 87        | 1        | 0,21        |
| <i>Laternula elliptica</i>                             | 0,027        | 0,012        | 0,047        | 86        | 1        | 0,22        |
| <i>Neuroglossum delesseriae</i>                        | 0,026        | 0,012        | 0,045        | 85        | 1        | 0,23        |
| <i>Trematocarpus antarcticus</i>                       | 0,025        | 0,011        | 0,045        | 84        | 1        | 0,24        |
| <i>Urospora penicilliformis</i>                        | 0,026        | 0,012        | 0,046        | 83        | 1        | 0,25        |
| Hyperidea                                              | 0,026        | 0,012        | 0,044        | 82        | 1        | 0,25        |
| <i>Hippomedon kergueleni</i>                           | 0,027        | 0,013        | 0,046        | 81        | 1        | 0,26        |
| <i>Euphausia superba</i>                               | 0,025        | 0,012        | 0,044        | 80        | 1        | 0,27        |
| <i>Iridaea cordata</i>                                 | 0,026        | 0,014        | 0,045        | 79        | 1        | 0,28        |
| <i>Plocamium cartilagineum</i>                         | 0,023        | 0,010        | 0,040        | 78        | 1        | 0,29        |
| Polychaeta                                             | 0,022        | 0,009        | 0,041        | 77        | 1        | 0,30        |
| <i>Desmarestia menziesii</i>                           | 0,020        | 0,009        | 0,038        | 76        | 1        | 0,31        |
| <b><i>Nacella concinna</i></b>                         | <b>0,021</b> | <b>0,009</b> | <b>0,038</b> | <b>75</b> | <b>2</b> | <b>0,32</b> |
| <i>Desmarestia anceps</i>                              | 0,017        | 0,007        | 0,032        | 74        | 2        | 0,33        |
| <i>Desmarestia antarctica</i>                          | 0,013        | 0,006        | 0,025        | 73        | 2        | 0,34        |
| <i>Paradexamine fissicauda</i>                         | 0,014        | 0,006        | 0,029        | 72        | 3        | 0,35        |
| <i>Aglaophamus trissophyllus</i>                       | 0,015        | 0,006        | 0,030        | 71        | 3        | 0,35        |
| <i>Gigartina skottsbergii</i>                          | 0,008        | 0,004        | 0,019        | 70        | 3        | 0,36        |
| Bryozoa                                                | 0,010        | 0,005        | 0,023        | 69        | 3        | 0,37        |
| Polyplacophora                                         | 0,008        | 0,004        | 0,020        | 68        | 3        | 0,38        |
| <i>Ophionotus victoriae</i>                            | 0,009        | 0,004        | 0,021        | 67        | 3        | 0,39        |
| Nemertea                                               | 0,009        | 0,003        | 0,021        | 66        | 3        | 0,40        |
| Polynoidae                                             | 0,007        | 0,003        | 0,018        | 65        | 3        | 0,41        |
| Cumacea                                                | 0,009        | 0,004        | 0,021        | 64        | 3        | 0,42        |
| <i>Pseudorchomene plebs</i>                            | 0,008        | 0,003        | 0,020        | 63        | 3        | 0,43        |
| <i>Prostebbingia gracilis</i>                          | 0,003        | 0,002        | 0,004        | 62        | 3        | 0,44        |
| <i>Sterechinus neumayeri</i>                           | 0,003        | 0,002        | 0,004        | 61        | 3        | 0,45        |
| <i>Curdiea racovitzae</i>                              | 0,003        | 0,002        | 0,004        | 60        | 3        | 0,45        |

| <b>EXTINTIONS BY DECREASING INTERMODULE CONNECTIVITY</b> |  |       |       |       |     |   |      |
|----------------------------------------------------------|--|-------|-------|-------|-----|---|------|
| Total                                                    |  | 0,030 | 0,019 | 0,044 | 110 | 1 | 0,00 |
| <i>Glyptonotus antarcticus</i>                           |  | 0,030 | 0,020 | 0,045 | 109 | 1 | 0,01 |



|                                    |              |              |              |           |          |             |
|------------------------------------|--------------|--------------|--------------|-----------|----------|-------------|
| Necromass                          | 0,029        | 0,018        | 0,045        | 108       | 1        | 0,02        |
| <i>Orchomenella sp.</i>            | 0,029        | 0,017        | 0,044        | 107       | 1        | 0,03        |
| <i>Djerboa furcipes</i>            | 0,029        | 0,018        | 0,044        | 106       | 1        | 0,04        |
| <i>Harpagifer antarcticus</i>      | 0,029        | 0,018        | 0,045        | 105       | 1        | 0,05        |
| <i>Trematomus newnesi</i>          | 0,028        | 0,018        | 0,044        | 104       | 1        | 0,05        |
| <i>Pseudorchomene plebs</i>        | 0,028        | 0,018        | 0,043        | 103       | 1        | 0,06        |
| Gammaridea                         | 0,025        | 0,014        | 0,043        | 102       | 1        | 0,07        |
| <i>Gobionotothen gibberifrons</i>  | 0,028        | 0,014        | 0,045        | 101       | 1        | 0,08        |
| <i>Trematomus bernacchii</i>       | 0,027        | 0,014        | 0,044        | 100       | 1        | 0,09        |
| Aged detritus                      | 0,027        | 0,014        | 0,045        | 99        | 1        | 0,10        |
| Fresh detritus                     | 0,026        | 0,014        | 0,043        | 98        | 1        | 0,11        |
| Polychaeta                         | 0,029        | 0,014        | 0,047        | 97        | 1        | 0,12        |
| <i>Gitanopsis squamosa</i>         | 0,028        | 0,014        | 0,045        | 96        | 1        | 0,13        |
| Copepoda                           | 0,026        | 0,014        | 0,043        | 95        | 1        | 0,14        |
| Phytoplankton                      | 0,027        | 0,014        | 0,045        | 94        | 1        | 0,15        |
| <i>Cheirimedon femoratus</i>       | 0,027        | 0,014        | 0,047        | 93        | 1        | 0,15        |
| Octopoda                           | 0,026        | 0,014        | 0,044        | 92        | 1        | 0,16        |
| <i>Aequiyoldia eightsii</i>        | 0,028        | 0,013        | 0,045        | 91        | 1        | 0,17        |
| Ostracoda                          | 0,027        | 0,014        | 0,045        | 90        | 1        | 0,18        |
| Ascidiacea                         | 0,026        | 0,013        | 0,044        | 89        | 1        | 0,19        |
| Hydrozoa                           | 0,026        | 0,014        | 0,044        | 88        | 1        | 0,20        |
| <i>Hippomedon kergueleni</i>       | 0,027        | 0,013        | 0,045        | 87        | 1        | 0,21        |
| <b><i>Notothenia coriiceps</i></b> | <b>0,028</b> | <b>0,015</b> | <b>0,046</b> | <b>86</b> | <b>9</b> | <b>0,22</b> |
| <i>Aglaophamus trissophyllus</i>   | 0,028        | 0,014        | 0,046        | 85        | 9        | 0,23        |
| Mysida                             | 0,026        | 0,014        | 0,044        | 84        | 9        | 0,24        |
| Cumacea                            | 0,027        | 0,014        | 0,044        | 83        | 9        | 0,25        |
| Nereididae                         | 0,027        | 0,014        | 0,044        | 82        | 9        | 0,25        |
| <i>Lindbergichthys nudifrons</i>   | 0,026        | 0,013        | 0,045        | 81        | 9        | 0,26        |
| <i>Bovallia gigantea</i>           | 0,028        | 0,014        | 0,046        | 80        | 9        | 0,27        |
| <i>Paradexamine fissicauda</i>     | 0,027        | 0,013        | 0,044        | 79        | 10       | 0,28        |
| Gastropoda                         | 0,027        | 0,013        | 0,046        | 78        | 10       | 0,29        |
| <i>Notothenia rossii</i>           | 0,027        | 0,014        | 0,044        | 77        | 11       | 0,30        |
| Tanaidacea                         | 0,027        | 0,013        | 0,044        | 76        | 11       | 0,31        |
| Benthic Diatomea                   | 0,027        | 0,014        | 0,043        | 75        | 12       | 0,32        |
| <i>Serolis sp.</i>                 | 0,026        | 0,013        | 0,046        | 74        | 12       | 0,33        |
| <i>Margarella antarctica</i>       | 0,026        | 0,014        | 0,046        | 73        | 11       | 0,34        |
| <i>Charcotia obesa</i>             | 0,026        | 0,014        | 0,044        | 72        | 11       | 0,35        |
| <i>Ophionotus victoriae</i>        | 0,026        | 0,014        | 0,043        | 71        | 11       | 0,35        |
| <i>Probolisca ovata</i>            | 0,026        | 0,013        | 0,044        | 70        | 10       | 0,36        |
| Polynoidae                         | 0,026        | 0,013        | 0,043        | 69        | 10       | 0,37        |
| <i>Oradarea bidentata</i>          | 0,026        | 0,013        | 0,045        | 68        | 10       | 0,38        |
| <i>Barrukia cristata</i>           | 0,027        | 0,014        | 0,045        | 67        | 10       | 0,39        |
| Polyplacophora                     | 0,028        | 0,014        | 0,044        | 66        | 10       | 0,40        |
| <i>Sterechinus neumayeri</i>       | 0,027        | 0,014        | 0,044        | 65        | 11       | 0,41        |
| <i>Hemiarthrum setulosum</i>       | 0,027        | 0,014        | 0,045        | 64        | 12       | 0,42        |
| <i>Nacella concinna</i>            | 0,029        | 0,014        | 0,046        | 63        | 14       | 0,43        |
| Priapulida                         | 0,026        | 0,013        | 0,045        | 62        | 14       | 0,44        |
| <i>Eurymera monticulosa</i>        | 0,027        | 0,014        | 0,046        | 61        | 14       | 0,45        |
| <i>Laternula elliptica</i>         | 0,026        | 0,013        | 0,045        | 60        | 14       | 0,45        |

## Referencias

Libralato, S. (2008). System Omnivory Index. En S. E. Jørgensen & B. D. Fath (Eds.), *Encyclopedia of Ecology* (pp. 3472-3477). Academic Press. <https://doi.org/10.1016/B978-008045405-4.00135-X>

Martinez, N. D. (1991). Artifacts or Attributes? Effects of Resolution on the Little Rock Lake Food Web. *Ecological Monographs*, 61(4), 367-392. <https://doi.org/10.2307/2937047>

Pawar, S., Dell, A. I., & Van M. Savage. (2012). Dimensionality of consumer search space drives trophic interaction strengths. *Nature*, 486(7404), 485-489. <https://doi.org/10.1038/nature11131>

Thompson, R. M., Hemberg, M., Starzomski, B. M., & Shurin, J. B. (2007). TROPHIC LEVELS AND TROPHIC TANGLES: THE PREVALENCE OF OMNIVORY IN REAL FOOD WEBS. *Ecology*, 88(3), 612-617. <https://doi.org/10.1890/05-1454>
